# Supplementary material for: Identification of Stmm3 locus Conferring Resistance to Late-stage Chemically Induced Skin Papillomas on Mouse Chromosome 4 by Congenic Mappingand Allele-specific Alteration Analysis
Source: PubMed Central journal article supplement — Exp Anim. 2014 Aug 22;63(3):339–48. doi: 10.1538/expanim.63.339 (PMC4206738; doi:10.1538/expanim.63.339), 2014-08-22
Supplement: expanim-63-339-s001.pdf [file expanim-63-339-s001.pdf]

**Supplementary table 1.** Papilloma incidence sorted according to size in congenic lines

|       | Papilloma number      |                  |                  | P-value                                   |                                           |
|-------|-----------------------|------------------|------------------|-------------------------------------------|-------------------------------------------|
|       | FVB/FVB-<br>(4a)+(4b) | MSM/FVB-<br>(4a) | MSM/FVB-<br>(4b) | FVB/FVB-<br>(4a)+(4b)<br>MSM/FVB-<br>(4a) | FVB/FVB-<br>(4a)+(4b)<br>MSM/FVB-<br>(4b) |
| ≤6 mm | 28.6 ± 8.26           | 27.7 ± 11.2      | 18.0 ± 14.6      | 0.444                                     | 0.0445 *                                  |
| >6 mm | 4.9 ± 5.24            | 7.0 ± 6.1        | 0.13 ± 0.34      | 0.297                                     | 0.000650 **                               |
| Total | 33.4 ± 11.3           | 34.7 ± 8.1       | 18.1 ± 14.6      | 0.435                                     | 0.0114 *                                  |

\*\*...p<0.01 \* ...p<0.05

P-value is from standard *t*-test.

**Supplementary table 2.** Microsatellite markers used for allelic imbalance analysis

| Marker           | Map position (cM) | Map position (bp)     | MSM allele loss or<br>FVB allele gain (%) | FVB allele loss or<br>MSM allele gain (%) |
|------------------|-------------------|-----------------------|-------------------------------------------|-------------------------------------------|
| <i>D4Mit17</i>   | 31.4              | 63026328 - 63026475   | 0                                         | 0                                         |
| <i>D4Mit1003</i> | -                 | 81330391 - 81330519   | 36.4                                      | 4.5                                       |
| <i>D4Mit328</i>  | 40                | 83646601 - 83646724   | 0                                         | 4.5                                       |
| <i>D4Mit302</i>  | 42.5              | 85150136 - 85150243   | 4.5                                       | 4.5                                       |
| <i>D4Mit327</i>  | 42.5              | 86096047 - 86096152   | 18.2                                      | 4.5                                       |
| <i>D4Mit26</i>   | 42.5              | 88709739 - 88709948   | 36.4                                      | 4.5                                       |
| <i>D4Mit165</i>  | 44.5              | 90783947 - 90784088   | 4.5                                       | 9.1                                       |
| <i>D4Mit15</i>   | 42.5              | 91223153 - 91223437   | 4.5                                       | 4.5                                       |
| <i>D4Mit166</i>  | 44.5              | 93541561 - 93541759   | 4.5                                       | 13.6                                      |
| <i>D4Mit31</i>   | 51.3              | 106785035 - 106785155 | 0                                         | 0                                         |
| <i>D4Mit211</i>  | -                 | 108880256 - 108880374 | 4.5                                       | 0                                         |
| <i>D4Mit157</i>  | 63.4              | 135094765 - 135094902 | 13.6                                      | 4.5                                       |
